# Supplementary material for: Gorlin Syndrome: Recent Advances in Genetic Testing and Molecular and Cellular Biological Research
Source: PubMed Central journal article supplement (PMC7590212; doi:10.3390/ijms21207559), 2020-10-13
Supplement: ijms-21-07559-s001.pdf [file ijms-21-07559-s001.pdf]

Table S1: The list of the mutations in patients with GS.

*PTCH1* mutation of Gorlin syndrome

| Mutation type | Nucleotide change | Amino acid changes | Exon/intron no. | Characterization | Reference no. |
|---------------|-------------------|--------------------|-----------------|------------------|---------------|
| Missense      | c.317T>G          | p.Leu106Arg        | Exon2           | Germline         | [1]           |
| Missense      | c.328G>T          | p.Gly110Trp        | Exon2           | Germline         | [2]           |
| Missense      | c.591G>C          | p.Trp197Cys        | Exon4           | Germline         | [3]           |
| Missense      | c.688A>C          | p.Thr230Pro        | Exon5           | Germline         | [4]           |
| Missense      | c.689C>G          | p.Thr230Arg        | Exon5           | .                | [3]           |
| Missense      | c.709G>A          | p.Glu237Lys        | Exon5           | Germline         | [5]           |
| Missense      | c.863G>A          | p.Gly288Asp        | Exon6           | Germline         | [6]           |
| Missense      | c.890T>C          | p.Leu297Pro        | Exon6           | .                | [3]           |
| Missense      | c.1115T>G         | p.Met372Arg        | Exon8           | .                | [7]           |
| Missense      | c.1162A>T         | p.Asn388Tyr        | Exon8           | Germline         | [8]           |
| Missense      | c.1247C>G         | p.Thr416Ser        | Exon9           | Somatic          | [6]           |
| Missense      | c.1325T>A         | p.Val442Glu        | Exon9           | Germline         | [9]           |
| Missense      | c.1346T>A         | p.Met449Lys        | Exon9           | Germline         | [10]          |
| Missense      | c.1415C>A         | p.Ala472Asp        | Exon10          | Germline         | [11]          |
| Missense      | c.1436T>G         | p.Leu479Arg        | Exon10          | Germline         | [12]          |
| Missense      | c.1439C>T         | p.Ser480Leu        | Exon10          | .                | [3]           |
| Missense      | c.1450G>A         | p.Gly484Arg        | Exon10          | .                | [3]           |
| Missense      | c.1451G>T         | p.Gly484Val        | Exon10          | Germline         | [11]          |
| Missense      | c.1450G>A         | p.Gly484Arg        | Exon10          | Germline         | [13]          |
| Missense      | c.1511C>T         | p.Pro504Leu        | Exon11          | Germline         | [13]          |
| Missense      | c.1517T>G         | p.Leu505Arg        | Exon11          | Germline         | [14]          |
| Missense      | c.1525G>C         | p.Gln509Arg        | Exon11          | Germline         | [15][16]      |
| Missense      | c.1526G>T         | p.Gly509Val        | Exon11          | Germline         | [12]          |
| Missense      | c.1526G>A         | p.Gly509Asp        | Exon11          | Germline         | [3][17]       |
| Missense      | c.1555G>C         | p.Ala519Pro        | Exon11          | .                | [3]           |
| Missense      | c.1660A>C         | p.Ser554Arg        | Exon12          | Germline         | [2]           |
| Missense      | c.1712G>C         | p.Arg571Pro        | Exon12          | .                | [3]           |
| Missense      | c.1939A>T         | p.Ser647Cys        | Exon14          | Germline         | [1]           |
| Missense      | c.1941C>A         | p.Ser647Arg        | Exon14          | Germline         | [13]          |
| Missense      | c.2183C>T         | p.Thr728Met        | Exon14          | .                | [3]           |
| Missense      | c.2186A>T         | p.Lys729Met        | Exon14          | Germline         | [18][19][20]  |
| Missense      | c.2250G>C         | p.Lys750Asn        | Exon14          | .                | [3]           |
| Missense      | c.2414T>G         | p.Ile805Arg        | Exon15          | .                | [3]           |
| Missense      | c.2447A>G         | p.Gln816Arg        | Exon15          | .                | [3]           |
| Missense      | c.2465T>C         | p.Leu822Pro        | Exon15          | Germline         | [13]          |
| Missense      | c.2776T>C         | p.Trp926Arg        | Exon17          | Germline         | [13]          |
| Missense      | c.2917C>A         | p.Gln973Lys        | Exon18          | .                | [3]           |
| Missense      | c.3062A>G         | p.Tyr1021Cys       | Exon18          | Germline         | [21]          |

|          |           |              |        |          |               |
|----------|-----------|--------------|--------|----------|---------------|
| Missense | c.3146A>T | p.Asn1049Ile | Exon18 | Germline | [22]          |
| Missense | c.3277G>C | p.Glu1093Arg | Exon19 | Germline | [19],[23]     |
| Missense | c.3394T>C | p.Ser1132Pro | Exon20 | Germline | [24]          |
| Missense | c.3395C>A | p.Ser1132Tyr | Exon20 | Germline | [16]          |
| Missense | c.3398C>T | p.Thr1133Ile | Exon20 | Germline | [25]          |
| Missense | c.3440T>G | p.Phe1147Cys | Exon20 | Germline | [6]           |
| Missense | c.3499G>A | p.Gly1167Arg | Exon21 | Germline | [6],[12],[26] |
| Missense | c.3956G>A | p.Arg1319His | Exon23 | Germline | [11]          |
| Missense | c.4314G>T | p.Glu1438Asp | Exon23 | Germline | [27]          |
| Nonsense | c.205A>T  | p.Lys69*     | Exon2  | Germline | [3]           |
| Nonsense | c.233G>A  | p.Trp78*     | Exon2  | Germline | [28]          |
| Nonsense | c.250C>T  | p.Gln84*     | Exon2  | Germline | [4]           |
| Nonsense | c.279C>A  | p.Tyr93*     | Exon2  | Germline | [29]          |
| Nonsense | c.294C>A  | p.Cys98*     | Exon2  | Germline | [3]           |
| Nonsense | c.305T>A  | p.Leu102*    | Exon2  | Germline | [4]           |
| Nonsense | c.343G>T  | p.Gly115*    | .      | .        | Unpublished   |
| Nonsense | c.379G>T  | p.Glu127*    | Exon2  | .        | [30]          |
| Nonsense | c.387G>A  | p.Trp129*    | Exon2  | Germline | [31]          |
| Nonsense | c.403C>T  | p.Arg135*    | Exon3  | Somatic  | [32],[33]     |
| Nonsense | c.403C>T  | p.Arg135*    | Exon3  | Germline | [34]          |
| Nonsense | c.466C>T  | p.Gln156*    | Exon3  | Germline | [3]           |
| Nonsense | c.478C>T  | p.Gln160*    | Exon3  | Germline | [35]          |
| Nonsense | c.550C>T  | p.Gln184*    | Exon3  | Germline | [36]          |
| Nonsense | c.661G>T  | p.Glu221*    | Exon5  | .        | [30]          |
| Nonsense | c.666T>A  | p.Tyr222*    | .      | .        | Unpublished   |
| Nonsense | c.672C>A  | p.Tyr224*    | Exon5  | .        | [13]          |
| Nonsense | c.707G>A  | p.Trp236*    | Exon5  | .        | [3]           |
| Nonsense | c.722T>G  | p.Leu241*    | .      | .        | [37]          |
| Nonsense | c.811del  | p.Ile271*    | .      | .        | [38]          |
| Nonsense | c.820C>T  | p.Gln274*    | Exon6  | .        | [30]          |
| Nonsense | c.833G>A  | p.Trp278*    | Exon6  | Germline | [11]          |
| Nonsense | c.873C>G  | p.Tyr291*    | Exon6  | Germline | [28]          |
| Nonsense | c.938C>G  | p.Ser313*    | Exon6  | .        | [30]          |
| Nonsense | c.1012C>T | p.Gln338*    | Exon7  | Somatic  | [32][33]      |
| Nonsense | c.1018G>T | p.Glu340*    | Exon7  | Germline | [39]          |
| Nonsense | c.1081C>T | p.Gln361*    | Exon8  | .        | [3]           |
| Nonsense | c.1093C>T | p.Gln365*    | Exon8  | Germline | [40]          |
| Nonsense | c.1119C>G | p.Tyr373*    | .      | .        | [3]           |
| Nonsense | c.1138G>T | p.Glu380*    | Exon8  | Germline | [12]          |
| Nonsense | c.1148C>G | p.Ser383*    | Exon8  | Germline | [41]          |
| Nonsense | c.1160G>A | p.Trp387*    | .      | .        | [42]          |
| Nonsense | c.1196G>A | p.Trp399*    | Exon8  | Germline | [43]          |

|                              |                  |                  |        |          |                |
|------------------------------|------------------|------------------|--------|----------|----------------|
| Nonsense                     | c.1198C>T        | p.Gln400*        | Exon8  | .        | [3]            |
| Nonsense                     | c.1237C>T        | p.Gln413*        | Exon9  | Germline | [19]           |
| Nonsense                     | c.1380G>A        | p.Trp460*        | Exon10 | .        | [3]            |
| Nonsense                     | c.1585A>T        | p.Lys529*        | Exon11 | Germline | [38]           |
| Nonsense                     | c.1691T>G        | p.Leu564*        | Exon12 | .        | [3]            |
| Nonsense                     | c.1712G>C        | p.Arg571Pro      | Exon12 | .        | [3]            |
| Nonsense                     | c.1804C>T        | p.Arg602*        | Exon13 | .        | [3]            |
| Nonsense                     | c.1810G>T        | p.Glu604*        | Exon13 | .        | [44]           |
| Nonsense                     | c.1975C>T        | p.Gln659*        | Exon14 | .        | [3]            |
| Nonsense                     | c.1987C>T        | p.Gln663*        | Exon14 | Germline | [19][38]       |
| Nonsense                     | c.2062C>T        | p.Gln688*        | Exon14 | Germline | [19][34]       |
| Nonsense                     | c.2098C>T        | p.Gln700*        | Exon14 | .        | [3]            |
| Nonsense                     | c.2170G>T        | p.Glu724*        | Exon14 | .        | [3]            |
| Nonsense                     | c.2308C>T        | p.Arg770*        | Exon15 | .        | [3]            |
| Nonsense                     | c.2359G>T        | p.Glu787*        | Exon15 | .        | [3]            |
| Nonsense                     | c.2391C>A        | p.Tyr787*        | Exon15 | Germline | [45]           |
| Nonsense                     | c.2446C>T        | p.Gln816*        | Exon15 | .        | [3]            |
| Nonsense                     | c.2557C>T        | p.Gln853*        | Exon15 | .        | [3]            |
| Nonsense                     | c.2619C>A        | p.Tyr873*        | Exon16 | Germline | [1][6][13][46] |
| Nonsense                     | c.2760C>A        | p.Tyr920*        | Exon17 | Germline | [26][47]       |
| Nonsense                     | c.2833C>T        | p.Arg945*        | Exon17 | Germline | [48]           |
| Nonsense                     | c.2908G>T        | p.Glu970*        | Exon18 | Germline | [2]            |
| Nonsense                     | c.3027C>A        | p.Tyr1009*       | Exon18 | .        | [3]            |
| Nonsense                     | c.3027C>G        | p.Tyr1009*       | Exon18 | .        | [3]            |
| Nonsense                     | c.3053G>A        | p.Trp1018*       | Exon18 | .        | [49]           |
| Nonsense                     | c.3058C>T        | p.Gln1020*       | Exon18 | Germline | [3][47]        |
| Nonsense                     | c.3062A>G        | p.Tyr1021Cys     | Exon18 | .        | [21]           |
| Nonsense                     | c.3265T>C        | p.Ser1089Pro     | .      | .        | [35]           |
| Nonsense                     | c.3277G>T        | p.Gly1093*       | Exon19 | .        | [30]           |
| Nonsense                     | c.3422C>T        | p.Ala1141Val     | .      | .        | [50]           |
| Small out-of-frame deletions | c.220delA        | p.Ala75Argfs*5   | Exon2  | Germline | [4]            |
| Small out-of-frame deletions | c.239_240delGA   | p.Arg80Serfs*9   | Exon2  | Germline | [43]           |
| Small out-of-frame deletions | c.256_257delCT   | p.Leu87Ilefs*2   | Exon2  | Germline | [34]           |
| Small out-of-frame deletions | c.265_287del23   | p.Gly91Argfs*41  | Exon2  | Germline | [16]           |
| Small out-of-frame deletions | c.278delA        | p.Tyr93Serfs*24  | Exon2  | Germline | [51]           |
| Small out-of-frame deletions | c.331delG        | p.Ala111Profs*6  | Exon2  | Germline | [1]            |
| Small out-of-frame deletions | c.479_482delAGAC | p.Gln160Profs*10 | Exon3  | Germline | [52]           |
| Small out-of-frame deletions | c.747_759del     | p.Gly250Cysfs*15 | .      | .        | Unpublished    |
| Small out-of-frame deletions | c.768_777del10   | p.Asn258Leufs*8  | Exon6  | Germline | [35]           |
| Small out-of-frame deletions | c.808delA        | p.Ile271*        | Exon6  | Germline | [38]           |
| Small out-of-frame deletions | c.865delC        | p.His289Metfs*35 | Exon6  | Germline | [2]            |
| Small out-of-frame deletions | c.912delC        | p.Ala306Profs*18 | Exon6  | Germline | [17]           |

|                              |                    |                    |        |          |          |
|------------------------------|--------------------|--------------------|--------|----------|----------|
| Small out-of-frame deletions | c.941delC          | p.Lys315Asnfs*9    | Exon6  | Germline | [34]     |
| Small out-of-frame deletions | c.980delG          | p.Cys327Phefs*5    | Exon7  | Germline | [47]     |
| Small out-of-frame deletions | c.1042_1043delAA   | p.Lys348Glufs*88   | .      | .        | [50]     |
| Small out-of-frame deletions | c.1208_1209delAT   | p.Tyr403Cysfs*33   | Exon8  | Germline | [13]     |
| Small out-of-frame deletions | c.1291delC         | p.Leu431*          | Exon9  | Germline | [13]     |
| Small out-of-frame deletions | c.1341_1344delACTC | p.Leu446fs*        | Exon9  | .        | [14]     |
| Small out-of-frame deletions | c.1383delC         | p.Asp460fs*        | Exon10 | .        | [14]     |
| Small out-of-frame deletions | c.1472delT         | p.Ile491Thrfs*51   | Exon10 | Germline | [53]     |
| Small out-of-frame deletions | c.1615delG         | p.Glu539Serfs*3    | Exon12 | Germline | [4]      |
| Small out-of-frame deletions | c.1670_1671delCA   | p.Thr557Serfs*69   | Exon12 | Germline | [43]     |
| Small out-of-frame deletions | c.2029delA         | p.Thr667Profs*16   | Exon14 | Germline | [43]     |
| Small out-of-frame deletions | c.2011delC         | p.His671Thrfs*22   | Exon14 | Germline | [17]     |
| Small out-of-frame deletions | c.2178delC         | p.Cys727Valfs*19   | Exon14 | Germline | [54]     |
| Small out-of-frame deletions | c.2179delT         | p.Cys727Valfs*19   | Exon14 | Germline | [32][33] |
| Small out-of-frame deletions | c.2195_2196delTC   | p.Ser733Ilefs*4    | Exon14 | Germline | [34]     |
| Small out-of-frame deletions | c.2196_2197delCT   | p.Ser733Ilefs*4    | Exon14 | Germline | [6]      |
| Small out-of-frame deletions | c.2197_2198delTC   | p.Ser733Ilefs*4    | Exon14 | Germline | [54]     |
| Small out-of-frame deletions | c.2287delG         | p.Val763Serfs*9    | Exon15 | Germline | [4]      |
| Small out-of-frame deletions | c.2395delT         | p.Ser799Leufs*7    | Exon15 | Germline | [29]     |
| Small out-of-frame deletions | c.2442_2452del11   | p.Ile815Thrfs*10   | Exon15 | Germline | [55]     |
| Small out-of-frame deletions | c.2577_2583del7    | p.Phe859Leufs*42   | Exon16 | Germline | [12]     |
| Small out-of-frame deletions | c.2576_2582del7    | p.Phe859Leufs*42   | Exon16 | Germline | [4]      |
| Small out-of-frame deletions | c.2582delG         | p.Ser861Metfs*14   | Exon16 | Germline | [56]     |
| Small out-of-frame deletions | c.2595delC         | p.Ile868Serfs*35   | Exon16 | Germline | [34]     |
| Small out-of-frame deletions | c.2719delC         | p.Leu907Trpfs*17   | Exon17 | Germline | [34]     |
| Small out-of-frame deletions | c.2798delC         | p.Ala933Glyfs*29   | Exon17 | Germline | [11]     |
| Small out-of-frame deletions | c.2824delC         | p.Arg942Glyfs*20   | Exon17 | Germline | [32][33] |
| Small out-of-frame deletions | c.2833_2843del     | p.Arg945Glyfs*10   | Exon17 | .        | [3]      |
| Small out-of-frame deletions | c.2869delC         | p.Pro957Leufs*5    | Exon17 | Germline | [57]     |
| Small out-of-frame deletions | c.3000_3007del8    | p.Asn1000Lysfs*142 | Exon18 | Germline | [27]     |
| Small out-of-frame deletions | c.3016delC         | p.Leu1006Cysfs*43  | Exon18 | Germline | [2]      |
| Small out-of-frame deletions | c.3042delC         | p.Phe1015Serfs*34  | Exon18 | Germline | [13]     |
| Small out-of-frame deletions | c.3375delC         | p.Val1126Serfs*13  | Exon20 | Germline | [4]      |
| Small out-of-frame deletions | c.3475delC         | p.Leu1159Serfs*32  | Exon21 | Germline | [58]     |
| Small out-of-frame deletions | c.3570delG         | p.Leu1190*         | Exon22 | Germline | [27]     |
| Small in-frame deletions     | c.114del           | p.Leu39Cysfs*41    | Exon1  | Germline | [3]      |
| Small in-frame deletions     | c.254_255del       | p.Arg85Thrfs*4     | Exon2  | Germline | [3]      |
| Small in-frame deletions     | c.258_259del       | p.Leu87Ilefs*2     | Exon2  | .        | [3]      |
| Small in-frame deletions     | c.262_265del       | p.Phe88Asnfs*28    | Exon2  | Germline | [30]     |
| Small in-frame deletions     | c.262_266del       | p.Phe88Thrfs*50    | Exon2  | Germline | [3]      |
| Small in-frame deletions     | c.290del           | p.Asn97Thrfs*20    | .      | Germline | [51]     |
| Small in-frame deletions     | c.331del           | p.Ala111Profs*6    | .      | Germline | [30]     |

|                          |                                           |                                |        |          |      |
|--------------------------|-------------------------------------------|--------------------------------|--------|----------|------|
| Small in-frame deletions | c.459del                                  | p.Phe153Leufs*6                | .      | Germline | [59] |
| Small in-frame deletions | c.479_482del                              | p.Gln160Profs*10               | Exon3  | .        | [3]  |
| Small in-frame deletions | c.724del                                  | p.Gln242Serfs*8                | Exon5  | .        | [3]  |
| Small in-frame deletions | c.771_780del                              | p.Asn258Leufs*8                | .      | .        | [35] |
| Small in-frame deletions | c.842del                                  | p.Met281Serfs*2                | Exon6  | .        | [3]  |
| Small in-frame deletions | c.865del                                  | p.His289Metfs*35               | Exon6  | Germline | [2]  |
| Small in-frame deletions | c.874del                                  | p.Met292Trpfs*32               | .      | .        | [30] |
| Small in-frame deletions | c.903del                                  | p.Pro302Glnfs*22               | .      | .        | [60] |
| Small in-frame deletions | c.922del                                  | p.Ala308Profs*16               | .      | .        | [49] |
| Small in-frame deletions | c.942del                                  | p.Lys315Asnfs*9                | .      | .        | [34] |
| Small in-frame deletions | c.1026del                                 | p.Ile342Metfs*25               | Exon7  | .        | [30] |
| Small in-frame deletions | c.1040_1049del                            | p.Val347Alafs*17               | Exon7  | .        | [3]  |
| Small in-frame deletions | c.1114del                                 | p.Met372Cysfs*60               | Exon8  | .        | [3]  |
| Small in-frame deletions | c.1208_1209del                            | p.Tyr403Cysfs*33               | Exon8  | .        | [13] |
| Small in-frame deletions | c.1279del                                 | p.Leu427Trpfs*5                | Exon9  | .        | [3]  |
| Small in-frame deletions | c.1309_1329del                            | p.Val437_Ala443del             | Exon9  | .        | [30] |
| Small in-frame deletions | c.1340_1343del                            | p.Leu447Serfs*8                | Exon9  | .        | [30] |
| Small in-frame deletions | c.1342_1345del                            | p.Leu448Cysfs*7                | Exon9  | Germline | [28] |
| Small in-frame deletions | c.1348_1350del                            | p.Leu450del                    | Exon10 | .        | [3]  |
| Small in-frame deletions | c.1415_1429del                            | p.Ala472_Leu476del             | Exon10 | .        | [3]  |
| Small in-frame deletions | c.1537_1539delGAT or<br>c.1540_1542delGAT | p.Asp513del or p.Asp514del     | Exon11 | Germline | [61] |
| Small in-frame deletions | c.1767_1769del                            | p.Leu590del                    | Exon13 | .        | [3]  |
| Small in-frame deletions | c.1852del                                 | p.Cys618Alafs*5                | Exon14 | .        | [3]  |
| Small in-frame deletions | c.(2250+1_2251-<br>1)_(2703+1_2704-1)del  | p.Val751_Gln901del             | .      | .        | [3]  |
| Small in-frame deletions | c.2444_2461del18                          | p.Ile815_Asp821delinsAsn       | Exon15 | Germline | [62] |
| Small in-frame deletions | c.2446_2448delCAG                         | p.Gln816del                    | Exon15 | Germline | [16] |
| Small in-frame deletions | c.2612_2615del                            | p.Asn871Ilefs*31               | Exon16 | .        | [3]  |
| Small in-frame deletions | c.2748del                                 | p.Ser917Alafs*7                | Exon17 | .        | [3]  |
| Small in-frame deletions | c.2793del                                 | p.Val932Serfs*30               | Exon17 | .        | [3]  |
| Small in-frame deletions | c.2833_2843del                            | p.Arg945Glyfs*10               | Exon17 | .        | [3]  |
| Small in-frame deletions | c.2924del                                 | p.Pro975Leufs*20               | Exon17 | .        | [30] |
| Small in-frame deletions | c.2993del                                 | p.Cys998Serfs*51               | .      | .        | [50] |
| Small in-frame deletions | c.3000_3005del6                           | p.Asn1000_Thr1002delinsLy<br>s | Exon18 | Germline | [12] |
| Small in-frame deletions | c.3042del                                 | p.Phe1015Serfs*34              | .      | .        | [13] |
| Small in-frame deletions | c.3050del                                 | p.Phe1017Serfs*32              | Exon18 | .        | [3]  |
| Small in-frame deletions | c.3051_3052del                            | p.Phe1017Leufs*127             | .      | .        | [12] |
| Small in-frame deletions | c.3055del                                 | p.Glu1019Serfs*30              | Exon18 | .        | [63] |
| Small in-frame deletions | c.3056_3059del                            | p.Glu1019Glyfs*29              | Exon18 | .        | [3]  |
| Small in-frame deletions | c.3107_3108del                            | p.Leu1036Cysfs*108             | Exon18 | .        | [3]  |

|                               |                    |                       |        |          |          |
|-------------------------------|--------------------|-----------------------|--------|----------|----------|
| Small in-frame deletions      | c.3135del          | p.Phe1046Serfs*3      | Exon18 | .        | [3]      |
| Small in-frame deletions      | c.3139del          | p.Leu1047Phefs*2      | Exon18 | .        | [3]      |
| Small in-frame deletions      | c.3139_3142del     | p.Leu1047*            | Exon18 | .        | [3]      |
| Small in-frame deletions      | c.3146A>T          | p.Asn1049Ile          | .      | .        | [3]      |
| Small in-frame deletions      | c.3150del          | p.Trp1051Glyfs*7      | Exon18 | .        | [3]      |
| Small in-frame deletions      | c.3181_3186del     | p.Ala1061_Leu1062del  | Exon19 | Germline | [28]     |
| Small in-frame deletions      | c.3233_3239del     | p.Leu1078Profs*7      | Exon19 | .        | [3]      |
| Small in-frame deletions      | c.3244_3249del6    | p.Pro1082_Val1083del  | Exon19 | Germline | [16]     |
| Small in-frame deletions      | c.3251_3272del     | p.Val1084Alafs*2      | Exon19 | .        | [3]      |
| Small in-frame deletions      | c.3280del          | p.Val1094Trpfs*12     | .      | .        | [30]     |
| Small in-frame deletions      | c.3364_3365del     | p.Met1122Valfs*22     | Exon20 | .        | [3]      |
| Small in-frame deletions      | c.3371del          | p.Ala1124Aspfs*15     | .      | .        | [30]     |
| Small in-frame deletions      | c.3375del          | p.Val1126Serfs*13     | Exon20 | .        | [3]      |
| Small in-frame deletions      | c.3394T>C          | p.Ser1132Pro          | .      | .        | [24]     |
| Small in-frame deletions      | c.3475del          | p.Leu1159Serfs*32     | Exon21 | .        | [58]     |
| Small in-frame deletions      | c.3525_3526del     | p.Leu1175Phefs*8      | Exon21 | .        | [3]      |
| Small in-frame deletions      | c.3531_3534del     | p.Phe1177Leufs*13     | .      | .        | [64]     |
| Small in-frame deletions      | c.4048C>T          | p.Arg1350Trp          | Exon23 | .        | [3]      |
| Small out-of-frame insertions | c.264_265insAATA   | p.Lys89Asnfs*52       | Exon2  | Somatic  | [53]     |
| Small out-of-frame insertions | c.282_283insA      | p.Gln95Thrfs*45       | Exon2  | Germline | [34]     |
| Small out-of-frame insertions | c.323_324insGA     | p.Ile108Metfs*10      | Exon2  | Germline | [12]     |
| Small out-of-frame insertions | c.361_362insGAGC   | p.Leu121Argfs*20      | Exon2  | Somatic  | [1]      |
| Small in-frame insertions     | c.1338_1339insGCG  | p.Tyr446_Leu447insAla | Exon9  | Germline | [1][46]  |
| Small in-frame insertions     | c.2178_2179insA    | p.Cys727Metfs*11      | Exon14 | .        | [3]      |
| Small duplications            | c.280dup           | p.Ile94Asnfs*46       | Exon2  | Germline | [13]     |
| Small duplications            | c.290dupA          | p.Asn97Lysfs*43       | Exon2  | Germline | [65]     |
| Small duplications            | c.385_386dup       | p.Trp129Cysfs*9       | Exon2  | Germline | [3]      |
| Small duplications            | c.572_575dup       | p.Met192Ilefs*61      | Exon3  | Germline | [3]      |
| Small duplications            | c.705dupC          | p.Trp236Leufs*16      | Exon5  | Germline | [27]     |
| Small duplications            | c.919dup           | p.Thr307Asnfs*12      | .      | .        | [30]     |
| Small duplications            | c.931dupA          | p.Asn312Lysfs*7       | Exon6  | Germline | [18][19] |
| Small duplications            | c.935dup           | p.Asn312Lysfs*7       | .      | .        | [12]     |
| Small duplications            | c.955dup           | p.Met319Asnfs*118     | .      | .        | [30]     |
| Small duplications            | c.1027_1028dupGT   | p.Gly344Thrfs*24      | Exon7  | Germline | [4]      |
| Small duplications            | c.1028_1029dup     | p.Gly344Trpfs*24      | .      | .        | [4]      |
| Small duplications            | c.1043_1046dupAGAA | p.Asn349Lysfs*88      | Exon7  | Germline | [66]     |
| Small duplications            | c.1100_1108dup     | p.Met367_Pro369dup    | .      | .        | [30]     |
| Small duplications            | c.1138_1195dup58   | p.Trp399*             | Exon8  | Germline | [43]     |

|                    |                    |                    |        |          |      |
|--------------------|--------------------|--------------------|--------|----------|------|
| Small duplications | c.1259dupT         | p.Ser421Phefs*16   | Exon9  | Germline | [67] |
| Small duplications | c.1261dupT         | p.Ser421Phefs*16   | Exon9  | Germline | [17] |
| Small duplications | c.1349dupT         | p.Ala451Argfs*46   | Exon10 | Germline | [68] |
| Small duplications | c.1366dup          | p.Thr456Asnfs*41   | Exon10 | .        | [3]  |
| Small duplications | c.1370dupT         | p.Met457Ilefs*40   | Exon10 | Germline | [69] |
| Small duplications | c.1353_1377dup     | p.Trp460Leufs*45   | .      | .        | [70] |
| Small duplications | c.1467dupA         | p.Leu490Ilefs*7    | Exon10 | Germline | [71] |
| Small duplications | c.1508dup          | p.Leu503Phefs*12   | Exon11 | .        | [3]  |
| Small duplications | c.1651dupA         | p.Thr551Asnfs*76   | Exon12 | Germline | [34] |
| Small duplications | c.1723dupC         | p.Leu575Profs*52   | Exon12 | Germline | [34] |
| Small duplications | c.1925dup          | p.Pro643Thrfs*11   | Exon14 | .        | [3]  |
| Small duplications | c.2011dup          | p.His671Profs*10   | Exon14 | .        | [3]  |
| Small duplications | c.2011_2012dupCA   | p.His673Argfs*21   | Exon14 | Germline | [12] |
| Small duplications | c.2178dupC         | p.Cys727Leufs*17   | Exon14 | Germline | [13] |
| Small duplications | c.2256_2262dup7    | p.Phe755Glyfs*37   | Exon15 | Germline | [72] |
| Small duplications | c.2392dupC         | p.Phe798Leufs*31   | Exon15 | Germline | [71] |
| Small duplications | c.2454dupA         | p.Leu819Thrfs*10   | Exon15 | Germline | [2]  |
| Small duplications | c.2535dupG         | p.His846Argfs*15   | Exon15 | Germline | [73] |
| Small duplications | c.2712dupA         | p.Gln905Thrfs*11   | Exon17 | Germline | [47] |
| Small duplications | c.2795_2799dup5    | p.Tyr934Serfs*30   | Exon17 | Germline | [16] |
| Small duplications | c.2918_2925dup8    | p.Phe976Serfs*22   | Exon18 | Germline | [11] |
| Small duplications | c.2960_2961dup     | p.Val988Leufs*8    | .      | .        | [49] |
| Small duplications | c.3025dup          | p.Tyr1009Leufs*136 | .      | .        | [74] |
| Small duplications | c.3026dupA         | p.Tyr1009*         | Exon18 | Germline | [27] |
| Small duplications | c.3244_3246dupCCC  | p.Pro1082dup       | Exon19 | Germline | [6]  |
| Small duplications | c.3325_3328dupGGCG | p.Asp1110Glyfs*36  | Exon20 | Germline | [75] |
| Small duplications | c.3497dup          | p.Asn1166Lysfs*18  | Exon21 | .        | [3]  |

## Reference

- Li, T.J.; Yuan, J.W.; Gu, X.M.; Sun, L.S.; Zhao, H.S. PTCH germline mutations in Chinese nevoid basal cell carcinoma syndrome patients. *Oral Dis.* **2008**, *14*, 174–179, doi:10.1111/j.1601-0825.2007.01369.x.
- Tanioka, M.; Takahashi, K.; Kawabata, T.; Kosugi, S.; Murakami, K.I.; Miyachi, Y.; Nishigori, C.; Iizuka, T. Germline mutations of the PTCH gene in Japanese patients with nevoid basal cell carcinoma syndrome. *Arch. Dermatol. Res.* **2005**, *296*, 303–308, doi:10.1007/s00403-004-0520-1.
- Reinders, M.G.; van Hout, A.F.; Cosgun, B.; Paulussen, A.D.; Leter, E.M.; Steijlen, P.M.; Mosterd, K.; van Geel, M.; Gille, J.J. New mutations and an updated database for the patched-1 (PTCH1) gene. *Mol. Genet. Genomic Med.* **2018**, *6*, 409–415, doi:10.1002/mgg3.380.
- Savino, M.; d’Apolito, M.; Formica, V.; Baorda, F.; Mari, F.; Renieri, A.; Carabba, E.; Tarantino, E.; Andreucci, E.; Belli, S.; et al. Spectrum of PTCH mutations in Italian nevoid basal cell-carcinoma syndrome patients: identification of thirteen novel alleles. *Hum. Mutat.* **2004**, *24*, 441, doi:10.1002/humu.9289.
- Zhang, T.; Chen, M.; Lü, Y.; Xing, Q.; Chen, W. A novel mutation of the PTCH1 gene activates the Shh/Gli signaling pathway in a Chinese family with nevoid basal cell carcinoma syndrome. *Biochem. Biophys. Res.*

- Commun.* **2011**, *409*, 166–170, doi:10.1016/j.bbrc.2011.04.047.
6. Sun, L.S.; Li, X.F.; Li, T.J. PTCH1 and SMO gene alterations in keratocystic odontogenic tumors. *J. Dent. Res.* **2008**, *87*, 575–579, doi:10.1177/154405910808700616.
  7. Alonso-González, J.; Gutiérrez-González, E.; Fernández-Redondo, V.; Vega-Gliemmo, A.; Toribio, J. Variable expression of naevoid basal cell carcinoma syndrome in a family with a novel mutation in the PTCH1 gene. *Clin. Exp. Dermatol.* **2012**, *37*, 311–313.
  8. Ogata, K.; Ikeda, M.; Miyoshi, K.; Yamamoto, Y.; Yamamoto, T.; Osaki, T.; Michimukai, E.; Tanaka, Y.; Sakamoto, A.; Oakamoto, T.; et al. Naevoid basal cell carcinoma syndrome with a palmar epidermoid cyst, milia and maxillary cysts [3]. *Br. J. Dermatol.* **2001**, *145*, 508–509.
  9. Nakamura, M.; Tokura, Y. A novel missense mutation in the PTCH1 gene in a premature case of nevoid basal cell carcinoma syndrome. *Eur. J. Dermatology* **2009**, *19*, 262–263.
  10. Kitano, H.; Koyama, Y.; Komiya, M.; Sato, N.; Nakayama, T. Basal cell nevus syndrome: New mutation of the patched homologue 1 gene. *J. Oral Maxillofac. Surgery, Med. Pathol.* **2014**, *26*, 506–510, doi:10.1016/j.ajoms.2013.04.016.
  11. Matsuzawa, N.; Nagao, T.; Shimozato, K.; Niikawa, N.; Yoshiura, K.I. Patched homologue 1 mutations in four Japanese families with basal cell nevus syndrome. *J. Clin. Pathol.* **2006**, *59*, 1084–1086, doi:10.1136/jcp.2005.029439.
  12. Pastorino, L.; Cusano, R.; Nasti, S.; Faravelli, F.; Forzano, F.; Baldo, C.; Barile, M.; Gliori, S.; Muggianu, M.; Ghigliotti, G.; et al. Molecular characterization of Italian nevoid basal cell carcinoma syndrome patients. *Hum. Mutat.* **2005**, *25*, 322–323, doi:10.1002/humu.9317.
  13. Boutet, N.; Bignon, Y.J.; Drouin-Garraud, V.; Sarda, P.; Longy, M.; Lacombe, D.; Gorry, P. Spectrum of PTCH1 mutations in French patients with Gorlin syndrome. *J. Invest. Dermatol.* **2003**, *121*, 478–481, doi:10.1046/j.1523-1747.2003.12423.x.
  14. Onodera, S.; Saito, A.; Hasegawa, D.; Morita, N.; Watanabe, K.; Nomura, T.; Shibahara, T.; Ohba, S.; Yamaguchi, A.; Azuma, T. Multi-layered mutation in hedgehog-related genes in Gorlin syndrome may affect the phenotype. *PLoS One* **2017**, *12*, doi:10.1371/journal.pone.0184702.
  15. Ng, D.; Stavrou, T.; Liu, L.; Taylor, M.D.; Gold, B.; Dean, M.; Kelley, M.J.; Dubovsky, E.C.; Vezina, G.; Nicholson, H.S.; et al. Retrospective family study of childhood medulloblastoma. *Am. J. Med. Genet.* **2005**, *134 A*, 399–403, doi:10.1002/ajmg.a.30653.
  16. Chidambaram, A.; Goldstein, A.M.; Gailani, M.R.; Gerrard, B.; Bale, S.J.; DiGiovanna, J.J.; Bale, A.E.; Dean, M. Mutations in the Human Homologue of the Drosophila patched Gene in Caucasian and African-American Nevoid Basal Cell Carcinoma Syndrome Patients. *Cancer Res.* **1996**, *56*.
  17. Fujii, K.; Kohno, Y.; Sugita, K.; Nakamura, M.; Moroi, Y.; Urabe, K.; Furue, M.; Yamada, M.; Miyashita, T. Mutations in the human homologue of Drosophila patched in Japanese nevoid basal cell carcinoma syndrome patients. *Hum. Mutat.* **2003**, *21*, 451–452, doi:10.1002/humu.9132.
  18. Ponti, G.; Pastorino, L.; Pollio, A.; Nasti, S.; Pellacani, G.; Mignogna, M.D.; Tomasi, A.; Del Forno, C.; Longo, C.; Bianchi-Scarrà, G.; et al. Ameloblastoma: A neglected criterion for nevoid basal cell carcinoma (Gorlin) syndrome. *Fam. Cancer* **2012**, *11*, 411–418, doi:10.1007/s10689-012-9529-3.
  19. Pastorino, L.; Pollio, A.; Pellacani, G.; Guarneri, C.; Ghiorzo, P.; Longo, C.; Bruno, W.; Giusti, F.; Bassoli, S.; Bianchi-Scarrà, G.; et al. Novel PTCH1 mutations in patients with keratocystic odontogenic tumors screened for nevoid basal cell carcinoma (NBCC) syndrome. *PLoS One* **2012**, *7*, doi:10.1371/journal.pone.0043827.
  20. Ponti, G.; Pollio, A.; Mignogna, M.D.; Pellacani, G.; Pastorino, L.; Bianchi-Scarrà, G.; Di Gregorio, C.; Magnoni,



- C.; Azzoni, P.; Greco, M.; et al. Unicystic ameloblastoma associated with the novel K729M PTCH1 mutation in a patient with nevoid basal cell carcinoma (Gorlin) syndrome. *Cancer Genet.* **2012**, *205*, 177–181, doi:10.1016/j.cancergen.2012.01.012.
21. Torrello, A.; Hernández-Martín, A.; Bueno, E.; Colmenero, I.; Rivera, I.; Requena, L.; Happle, R.; González-Sarmiento, R. Molecular evidence of type 2 mosaicism in Gorlin syndrome. *Br. J. Dermatol.* **2013**, *169*, 1342–1345, doi:10.1111/bjd.12458.
  22. Li, J.; Wang, J.; Liu, Y.; Wang, W. Analysis of mutation in exon 17 of PTCH in patients with nevoid basal cell carcinoma syndrome. *Mol. Biol. Rep.* **2010**, *37*, 359–362, doi:10.1007/s11033-009-9782-1.
  23. Ponti, G.; Pollio, A.; Pastorino, L.; Pellacani, G.; Magnoni, C.; Nasti, S.; Fortuna, G.; Tomasi, A.; Scarrà, G.B.; Seidenari, S. Patched homolog 1 gene mutation (p.G1093R) induces nevoid basal cell carcinoma syndrome and non-syndromic keratocystic odontogenic tumors: A case report. *Oncol. Lett.* **2012**, *4*, 241–244, doi:10.3892/ol.2012.707.
  24. Reifenberger, J.; Arnold, N.; Kiechle, M.; Reifenberger, G.; Hauschild, A. Coincident PTCH and BRCA1 germline mutations in a patient with nevoid basal cell carcinoma syndrome and familial breast cancer [2]. *J. Invest. Dermatol.* **2001**, *116*, 472–474.
  25. Otsubo, S.; Honma, M.; Asano, K.; Takahashi, H.; Iizuka, H. A novel germ-line mutation of PTCH1 gene in a Japanese family of nevoid basal cell carcinoma syndrome: Are the palmoplantar pits associated with true basal cell carcinoma? *J. Dermatol. Sci.* **2008**, *51*, 144–146.
  26. Barreto, D.C.; Gomez, R.S.; Bale, A.E.; Boson, W.L.; De Marco, L. PTCH gene mutations in odontogenic keratocysts. *J. Dent. Res.* **2000**, *79*, 1418–1422, doi:10.1177/00220345000790061101.
  27. Lench, N.J.; Telford, E.A.R.; High, A.S.; Markham, A.F.; Wicking, C.; Wainwright, B.J. Characterisation of human patched germ line mutations in naevoid basal cell carcinoma syndrome. *Hum. Genet.* **1997**, *100*, 497–502, doi:10.1007/s004390050541.
  28. Guo, Y.Y.; Zhang, J.Y.; Li, X.F.; Luo, H.Y.; Chen, F.; Li, T.J. PTCH1 Gene Mutations in Keratocystic Odontogenic Tumors: A Study of 43 Chinese Patients and a Systematic Review. *PLoS One* **2013**, *8*, doi:10.1371/journal.pone.0077305.
  29. Minami, M.; Urano, Y.; Ishigami, T.; Tsuda, H.; Kusaka, J.; Arase, S. Germline mutations of the PTCH gene in Japanese patients with nevoid basal cell carcinoma syndrome. *J. Dermatol. Sci.* **2001**, *27*, 21–26, doi:10.1016/S0923-1811(01)00104-9.
  30. Klein, R.D.; Dykas, D.J.; Bale, A.E. Clinical testing for the nevoid basal cell carcinoma syndrome in a DNA diagnostic laboratory. *Genet. Med.* **2005**, *7*, 611–619, doi:10.1097/01.gim.0000182879.57182.b4.
  31. Suzuki, M.; Hatsuse, H.; Nagao, K.; Takayama, Y.; Kameyama, K.; Kabasawa, Y.; Omura, K.; Yoshida, M.; Fujii, K.; Miyashita, T. Selective haploinsufficiency of longer isoforms of PTCH1 protein can cause nevoid basal cell carcinoma syndrome. *J. Hum. Genet.* **2012**, *57*, 422–426, doi:10.1038/jhg.2012.45.
  32. Pan, S.; Li, T.J. PTCH1 mutations in odontogenic keratocysts: Are they related to epithelial cell proliferation? *Oral Oncol.* **2009**, *45*, 861–865, doi:10.1016/j.oraloncology.2009.02.003.
  33. Pan, S.; Xu, L. li; Sun, L. sha; Li, T. jun Identification of known and novel PTCH mutations in both syndromic and non-syndromic keratocystic odontogenic tumors. *Int. J. Oral Sci.* **2009**, *1*, 34–38, doi:10.4248/ijos.08013.
  34. Wicking, C.; Gillies, S.; Smyth, I.; Shanley, S.; Fowles, L.; Ratcliffe, J.; Wainwright, B.; Chenevix-Trench, G. De novo mutations of the patched gene in nevoid basal cell carcinoma syndrome help to define the clinical phenotype. *Am. J. Med. Genet.* **1997**, *73*, 304–307, doi:10.1002/(SICI)1096-8628(19971219)73:3<304::AID-AJMG14>3.0.CO;2-N.

35. Song, Y.L.; Zhang, W.F.; Peng, B.; Wang, C.N.; Wang, Q.; Bian, Z. Germline mutations of the PTCH gene in families with odontogenic keratocysts and nevoid basal cell carcinoma syndrome. *Tumor Biol.* **2006**, *27*, 175–180, doi:10.1159/000093054.
36. Endo, M.; Fujii, K.; Miyashita, T.; Uchikawa, H.; Tanabe, R.; Sugita, K.; Arai, H.; Kohno, Y. PTCH1 gene analysis in 25 Japanese patients with Gorlin syndrome. *No To Hattatsu* **2009**, *41*, 259–263, doi:10.11251/ojjsn.41.259.
37. Shevchenko, Y.O.; Bale, S.J.; Compton, J.G. Mutation Screening Using Automated Bidirectional Dideoxy Fingerprinting. *Biotechniques* **2000**, *28*, 134–138, doi:10.2144/00281rr01.
38. K, H.-T.; V, B.; J, L.; F, O.; JR, S.; AM, F. Gorlin syndrome: identification of 4 novel germ-line mutations of the human patched (PTCH) gene. Mutations in brief no. 137. Online. *Hum. Mutat.* **1998**, *11*, doi:10.1002/(SICI)1098-1004(1998)11:6<480::AID-HUMU9>3.0.CO;2-4.
39. Romano, M.; Iacovello, D.; Cascone, N.C.; Contestabile, M.T. Identification of a novel mutation in the PTCH gene in a patient with Gorlin-Goltz syndrome with unusual ocular disorders. *Eur. J. Ophthalmol.* **2011**, *21*, 516–519, doi:10.5301/EJO.2010.6186.
40. Hahn, H.; Wicking, C.; Zaphiropoulos, P.G.; Gailani, M.R.; Shanley, S.; Chidambaram, A.; Vorechovsky, I.; Holmberg, E.; Uden, A.B.; Gillies, S.; et al. Mutations of the human homolog of drosophila patched in the nevoid basal cell carcinoma syndrome. *Cell* **1996**, *85*, 841–851, doi:10.1016/S0092-8674(00)81268-4.
41. Scott, A.; Strouthidis, N.G.; Robson, A.G.; Forsyth, J.; Maher, E.R.; Schlottmann, P.G.; Michaelides, M. Bilateral Epiretinal Membranes in Gorlin Syndrome Associated With a Novel PTCH Mutation. *Am. J. Ophthalmol.* **2007**, *143*, 346–348, doi:10.1016/j.ajo.2006.09.022.
42. Wicking, C.; Shanley, S.; Smyth, I.; Gillies, S.; Negus, K.; Graham, S.; Suthers, G.; Haites, N.; Edwards, M.; Wainwright, B.; et al. Most germ-line mutations in the nevoid basal cell carcinoma syndrome lead to a premature termination of the patched protein, and no genotype- phenotype correlations are evident. *Am. J. Hum. Genet.* **1997**, *60*, 21–26.
43. Takahashi, C.; Kanazawa, N.; Yoshikawa, Y.; Yoshikawa, R.; Saitoh, Y.; Chiyo, H.; Tanizawa, T.; Hashimoto-Tamaoki, T.; Nakano, Y. Germline PTCH1 mutations in Japanese basal cell nevus syndrome patients. *J. Hum. Genet.* **2009**, *54*, 403–408, doi:10.1038/jhg.2009.55.
44. Reinders, M.G.H.C.; Boersma, H.J.; Leter, E.M.; Vreeburg, M.; Paulussen, A.D.C.; Arits, A.H.M.M.; Roemen, G.M.J.M.; Speel, E.J.M.; Steijlen, P.M.; van Geel, M.; et al. Postzygotic mosaicism in basal cell naevus syndrome. *Br. J. Dermatol.* **2017**, *177*, 249–252, doi:10.1111/bjd.15082.
45. Kansal, A.; Brueton, L.; Lahiri, A.; Lester, R. Hypoplastic thumb in Gorlin's syndrome. *J. Plast. Reconstr. Aesthetic Surg.* **2007**, *60*, 440–442, doi:10.1016/j.bjps.2006.06.006.
46. Gu, X.M.; Zhao, H.S.; Sun, L.S.; Li, T.J. PTCH mutations in sporadic and Gorlin-syndrome-related odontogenic keratocysts. *J. Dent. Res.* **2006**, *85*, 859–863, doi:10.1177/154405910608500916.
47. Fujii, M.; Noguchi, K.; Urade, M.; Muraki, Y.; Moridera, K.; Kishimoto, H.; Hashimoto-Tamaoki, T.; Nakano, Y. Novel PTCH1 mutations in Japanese Nevoid basal cell carcinoma syndrome patients: Two familial and three sporadic cases including the first Japanese patient with medulloblastoma. *J. Hum. Genet.* **2011**, *56*, 277–283, doi:10.1038/jhg.2011.2.
48. Smyth, I.; Wicking, C.; Wainwright, B.; Chenevix-Trench, G. The effects of splice site mutations in patients with naevoid basal cell carcinoma syndrome. *Hum. Genet.* **1998**, *102*, 598–601, doi:10.1007/s004390050747.
49. Soufir, N.; Gerard, B.; Portela, M.; Brice, A.; Liboutet, M.; Saiag, P.; Descamps, V.; Kerob, D.; Wolkenstein, P.; Gorin, I.; et al. PTCH mutations and deletions in patients with typical nevoid basal cell carcinoma syndrome

- and in patients with a suspected genetic predisposition to basal cell carcinoma: A French study. *Br. J. Cancer* **2006**, *95*, 548–553, doi:10.1038/sj.bjc.6603303.
50. Pruvost-Balland, C.; Gorry, P.; Boutet, N.; Magnaldo, T.; Mamelle, G.; Margulis, A.; Kolb, F.; Duvillard, P.; Spatz, A.; Brugières, L.; et al. Étude clinique et recherche de mutations germinales du gène PTCH 1 dans le syndrome des hamartomes basocellulaires. *Ann. Dermatol. Venereol.* **2006**, *133*, 117–123, doi:10.1016/S0151-9638(06)70861-4.
  51. Wilson, L.C.; Ajayi-Obe, E.; Bernhard, B.; Maas, S.M. Patched mutations and hairy skin patches: A new sign in Gorlin syndrome. In Proceedings of the American Journal of Medical Genetics, Part A; Am J Med Genet A, 2006; Vol. 140, pp. 2625–2630.
  52. Abe, S.; Kabashima, K.; Sakabe, J.I.; Shimauchi, T.; Van, Z.; Okamoto, T.; Tokura, Y. Coincident two mutations and one single nucleotide polymorphism of the PTCH1 gene in a family with naevoid basal cell carcinoma syndrome. *Acta Derm. Venereol.* **2008**, *88*, 635–636.
  53. Sasaki, R.; Miyashita, T.; Matsumoto, N.; Fujii, K.; Saito, K.; Ando, T. Multiple keratocystic odontogenic tumors associated with nevoid basal cell carcinoma syndrome having distinct PTCH1 mutations: A case report. *Oral Surgery, Oral Med. Oral Pathol. Oral Radiol. Endodontology* **2010**, *110*, doi:10.1016/j.tripleo.2010.04.006.
  54. Kadlub, N.; Coudert, A.; Gatibelza, M.E.; El Houmami, N.; Soufir, N.; Ruhin-Poncet, B.; L'Hermine, A.C.; Berdal, A.; Vazquez, M.P.; Descroix, V.; et al. PTCH1 mutation and local aggressiveness of odontogenic keratocystic tumors in children: Is there a relationship? *Hum. Pathol.* **2013**, *44*, 1071–1078, doi:10.1016/j.humpath.2012.09.012.
  55. Johnson, R.L.; Rothman, A.L.; Xie, J.; Goodrich, L. V.; Bare, J.W.; Bonifas, J.M.; Quinn, A.G.; Myers, R.M.; Cox, D.R.; Epstein, E.H.; et al. Human homolog of patched, a candidate gene for the basal cell nevus syndrome. *Science (80- )*. **1996**, *272*, 1668–1671, doi:10.1126/science.272.5268.1668.
  56. Seracchioli, R.; Bagnoli, A.; Colombo, F.M.; Missiroli, S.; Venturoli, S. Conservative treatment of recurrent ovarian fibromas in a young patient affected by Gorlin syndrome.
  57. García De Marcos, J.A.; Dean-Ferrer, A.; Arroyo Rodríguez, S.; Calderón-Polanco, J.; Alamillos Granados, F.J.; Poblet, E. Basal cell nevus syndrome: Clinical and genetic diagnosis. *Oral Maxillofac. Surg.* **2009**, *13*, 225–230, doi:10.1007/s10006-009-0169-1.
  58. Kitsiou-Tzeli, S.; Willems, P.; Kosmadaki, M.; Leze, E.; Vrettou, C.; Kanavakis, E.; Katsarou, A. Nevoid basal carcinoma syndrome (Gorlin syndrome) and pronounced androgenic alopecia in a woman with a novel mutation p.Leu1159fsx32 in the PTCH gene. *J. Dermatol.* **2011**, *38*, 1205–1208.
  59. Detecting tissue-specific alternative splicing and disease-associated aberrant splicing of the PTCH gene with exon junction microarrays | Human Molecular Genetics | Oxford Academic.
  60. Škodrić-Trifunović, V.; Stjepanović, M.; Savić, Ž.; Ilić, M.; Kavečan, I.; Privrodski, J.J.; Spasovski, V.; Stojiljković, M.; Pavlović, S. Novel Patched 1 mutations in patients with nevoid basal cell carcinoma syndrome - case report. *Croat. Med. J.* **2015**, *56*, 63–67, doi:10.3325/cmj.2015.56.63.
  61. Lü, Y.; Zhu, H.; Ye, W.; Zhang, M.; He, D.; Chen, W. A new mutation of PTCH gene in a Chinese family with nevoid basal cell carcinoma syndrome. *Chin. Med. J. (Engl)*. **2008**, *121*, 118–21.
  62. Le Brun Keris, Y.; Jouk, P.S.; Saada-Sebag, G.; Roux, J.J.; Mattei, B.; Bagait, L.; Paoloni-Giacobino, A.; Grandchamp, B.; Soufir, N.; Lespinasse, J. Prenatal manifestation in a family affected by nevoid basal cell carcinoma syndrome. *Eur. J. Med. Genet.* **2008**, *51*, 472–478, doi:10.1016/j.ejmg.2008.04.002.
  63. Jimbo, T.; Masumoto, K.; Urita, Y.; Takayasu, H.; Shinkai, T.; Uesugi, T.; Gotoh, C.; Sakamoto, N.; Sasaki, T.; Oto, T.; et al. Nevoid basal cell carcinoma syndrome with a unilateral giant ovarian fibroma in a Japanese 6-

- year-old girl. *Eur. J. Pediatr.* **2014**, *173*, 667–670, doi:10.1007/s00431-013-2200-7.
64. Marsh, A.; Wicking, C.; Wainwright, B.; Chenevix-Trench, G. DHPLC analysis of patients with Nevoid Basal Cell Carcinoma Syndrome reveals novel PTCH missense mutations in the sterol-sensing domain. *Hum. Mutat.* **2005**, *26*, 283, doi:10.1002/humu.9365.
65. Kijima, C.; Miyashita, T.; Suzuki, M.; Oka, H.; Fujii, K. Two cases of nevoid basal cell carcinoma syndrome associated with meningioma caused by a PTCH1 or SUFU germline mutation. *Fam. Cancer* **2012**, *11*, 565–570, doi:10.1007/s10689-012-9548-0.
66. Musani, V.; Gorry, P.; Basta-Juzbasic, A.; Stipic, T.; Miklic, P.; Levanat, S. Mutation in exon 7 of PTCH deregulates SHH/PTCH/SMO signaling: Possible linkage to WNT. *Int. J. Mol. Med.* **2006**, *17*, 755–759, doi:10.3892/ijmm.17.5.755.
67. Fujii, K.; Miyashita, T.; Omata, T.; Kobayashi, K.; Takanashi, J.I.; Kouchi, K.; Yamada, M.; Kohno, Y. Gorlin syndrome with ulcerative colitis in a Japanese girl. *Am. J. Med. Genet.* **2003**, *121 A*, 65–68, doi:10.1002/ajmg.a.20082.
68. Geneviève, D.; Walter, E.; Gorry, P.; Jacquemont, M.L.; Dupic, L.; Layet, V.; Munnich, A.; Cormier-Daire, V.; Dommergues, M.; Lyonnet, S.; et al. Gorlin syndrome presenting as prenatal chylothorax in a girl. *Prenat. Diagn.* **2005**, *25*, 997–999, doi:10.1002/pd.1231.
69. Tostar, U.; Malm, C.J.; Meis-Kindblom, J.M.; Kindblom, L.G.; Toftgård, R.; Undén, A.B. Deregulation of the hedgehog signalling pathway: A possible role for the PTCH and SUFU genes in human rhabdomyoma and rhabdomyosarcoma development. *J. Pathol.* **2006**, *208*, 17–25, doi:10.1002/path.1882.
70. Mazzuocolo, L.D.; Martínez, M.F.; Muchnik, C.; Azurmendi, P.J.; Stengel, F. SÍNDROME DE CARCINOMA BASOCELULAR NEVOIDE Y AGENESIA DE CUERPO CALLOSO SÍNDROME DE CARCINOMA BASOCELULAR NEVOIDE CON AGENESIA DE CUERPO CALLOSO, MUTACIÓN EN PTCH1 Y AUSENCIA DE CARCINOMA BASOCELULAR. *CASUÍSTICA Med. (Buenos Aires)* **2014**, *74*, 307–310.
71. Lam, C.W.; Leung, C.Y.; Lee, K.C.; Xie, J.; Lo, F.M.; Au, T.S.; Tong, S.F.; Poon, M.K.; Chan, L.Y.; Luk, N.M. Novel mutations in the PATCHED gene in basal cell nevus syndrome. *Mol. Genet. Metab.* **2002**, *76*, 57–61, doi:10.1016/S1096-7192(02)00021-5.
72. Muramatsu, S.; Suga, Y.; Mizuno, Y.; Hasegawa, T.; Komuro, Y.; Kubo, Y.; Imakado, S.; Ogawa, H. A Japanese case of naevoid basal cell carcinoma syndrome associated with segmental vitiligo [8]. *Br. J. Dermatol.* **2005**, *152*, 812–814.
73. Pastorino, L.; Cusano, R.; Baldo, C.; Forzano, F.; Nasti, S.; Di Rocco, M.; Carta, M.; Dagna Bricarelli, F.; Faravelli, F.; Bianchi Scarrà, G. Nevoid Basal Cell Carcinoma Syndrome in infants: Improving diagnosis. *Child. Care. Health Dev.* **2005**, *31*, 351–354, doi:10.1111/j.1365-2214.2005.00514.x.
74. García-Oguiza, A.; Miralbé-Terraza, S.; Calvo-Martín, M.T.; Labarta-Aizpun, J.; López-Pisón, J.; Marco-Tello, A.; Rebagé Moisés, V. Neonatal Gorlin syndrome associated to hemimegalencephaly confirmed by genetic study [1]. *Rev. Neurol.* **2006**, *43*, 251–253.
75. Sasaki, R.; Saito, K.; Watanabe, Y.; Takayama, Y.; Fujii, K.; Agawa, K.; Miyashita, T.; Ando, T.; Akizuki, T. Nevoid basal cell carcinoma syndrome with cleft lip and palate associated with the novel PTCH gene mutations. *J. Hum. Genet.* **2009**, *54*, 398–402, doi:10.1038/jhg.2009.51.
